# Supplementary material for: Stimuli-Responsive Properties of Supramolecular Gels Based on Pyridyl-N-oxide Amides
Source: MDPI journal article supplement (doi:10.3390/gels9020089), 2023-01-20

# Supporting Information

## Stimuli-responsive Properties of Supramolecular Gels based on Pyridyl-*N*-oxide Amides

Sreejith Sudhakaran Jayabhavan<sup>1</sup>, Baldur Kristinsson<sup>1</sup>, Dipankar Ghosh<sup>1</sup>, Charlène Breton<sup>1</sup>, and Krishna K. Damodaran<sup>1,\*</sup>

### Table of contents

|    |                                                   |    |
|----|---------------------------------------------------|----|
| 1. | Synthetic scheme .....                            | 2  |
| 2. | Rheology .....                                    | 3  |
| 3. | Scanning electron microscopy .....                | 4  |
| 4. | X-ray crystallography .....                       | 8  |
| 5. | Physical properties in the presence of salts..... | 11 |
| 6. | NMR spectra .....                                 | 16 |

## 1. Synthetic scheme

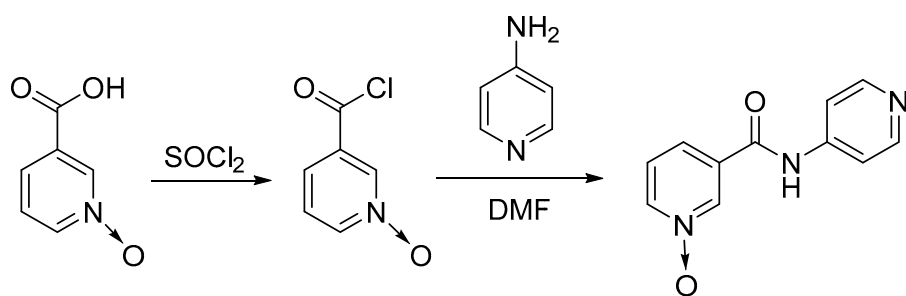

**Scheme S1.** Synthesis of  $L_1$

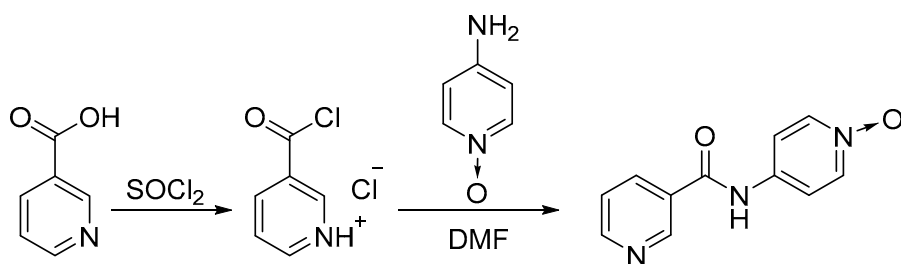

**Scheme S2.** Synthesis of  $L_2$

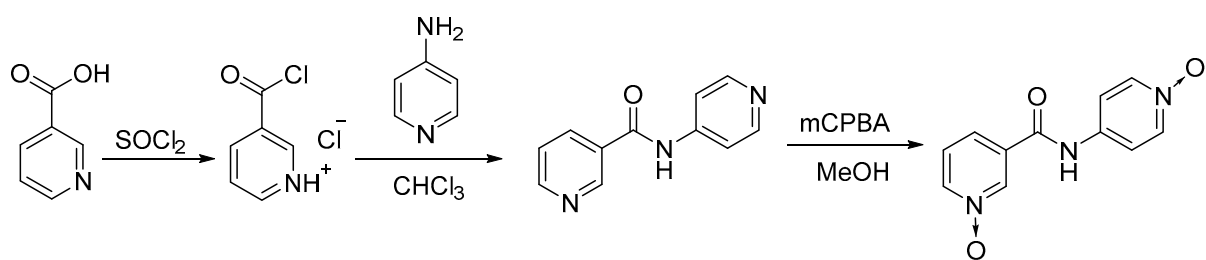

**Scheme S3.** Synthesis of  $L_3$

## 2. Rheology

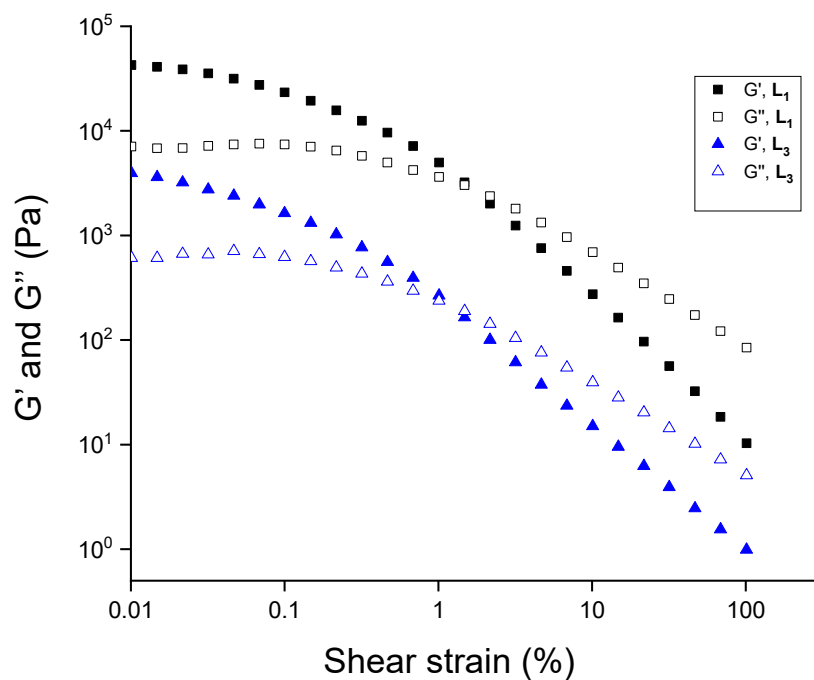

**Figure S1.** Amplitude-sweep experiments with gels of  $L_1$  and  $L_3$  (2.0 wt%) in water at 20.0 °C with a constant frequency of 1.0 Hz.

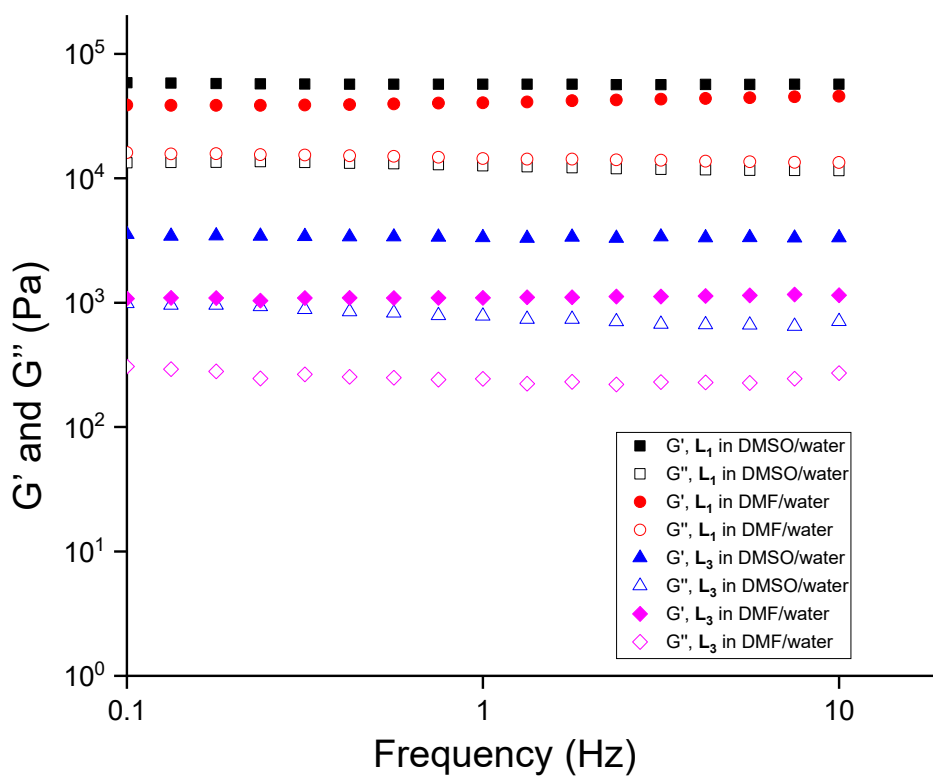

**Figure S2.** Frequency-sweep experiments with gels of  $L_1$  and  $L_3$  (2.0 wt%) in aqueous mixtures at 20.0 °C with a constant strain of 0.02%.

### 3. Scanning electron microscopy (SEM)

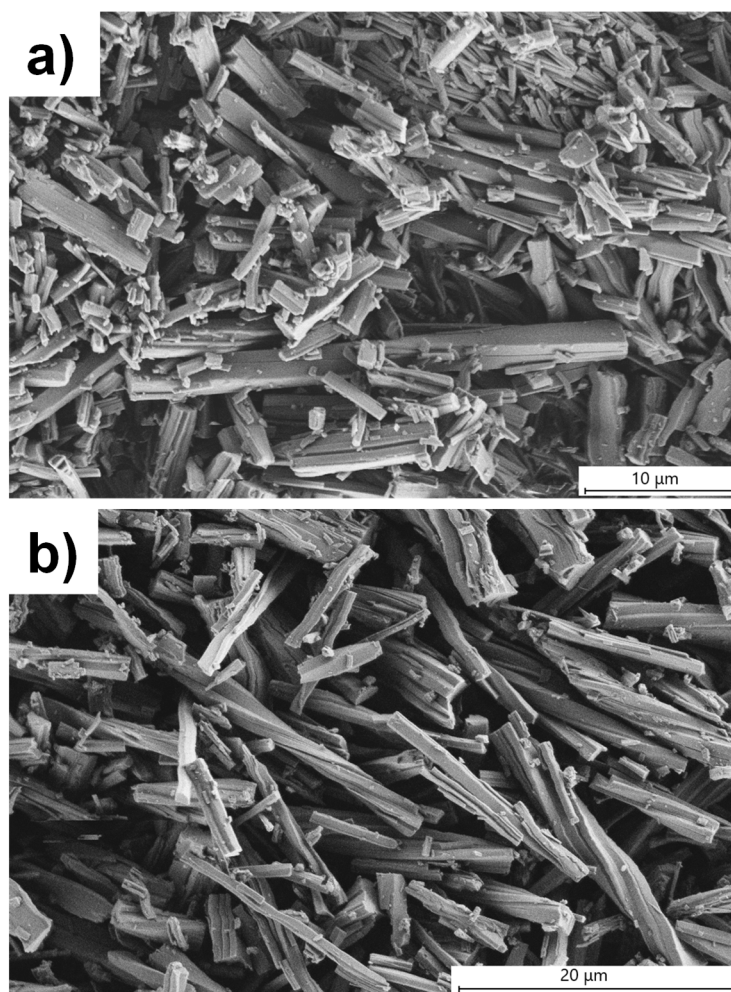

**Figure S3.** SEM images of (a)  $L_1$  and (b)  $L_3$  xerogels in water at 1.8 wt%.

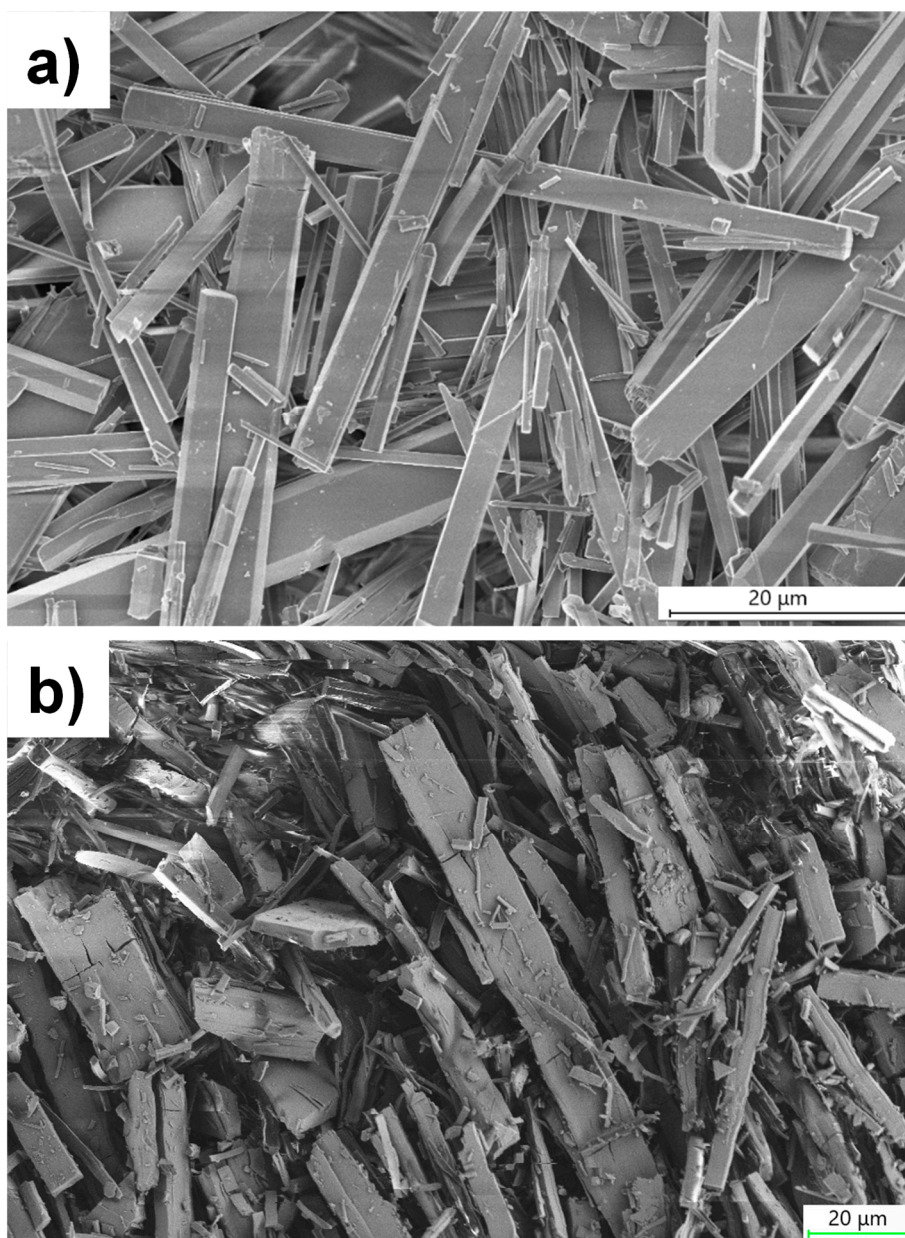

**Figure S4.** SEM images of the xerogels of (a)  $L_3$  and (b) diNO gels obtained from water at 4.0 wt%.

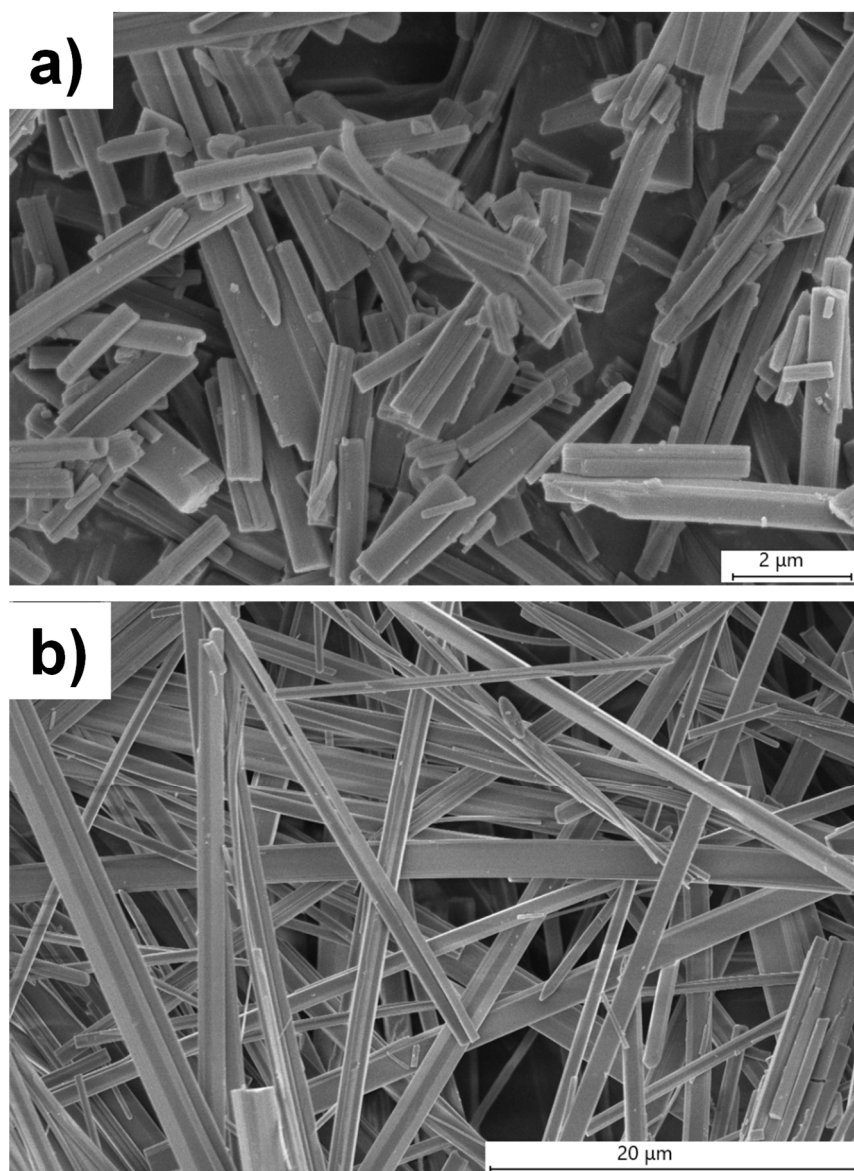

**Figure S5.** SEM images of L<sub>1</sub> xerogels in (a) DMSO/water (1:1, v/v) and (b) methanol/water (1:1, v/v) at 2.0 wt/v%.

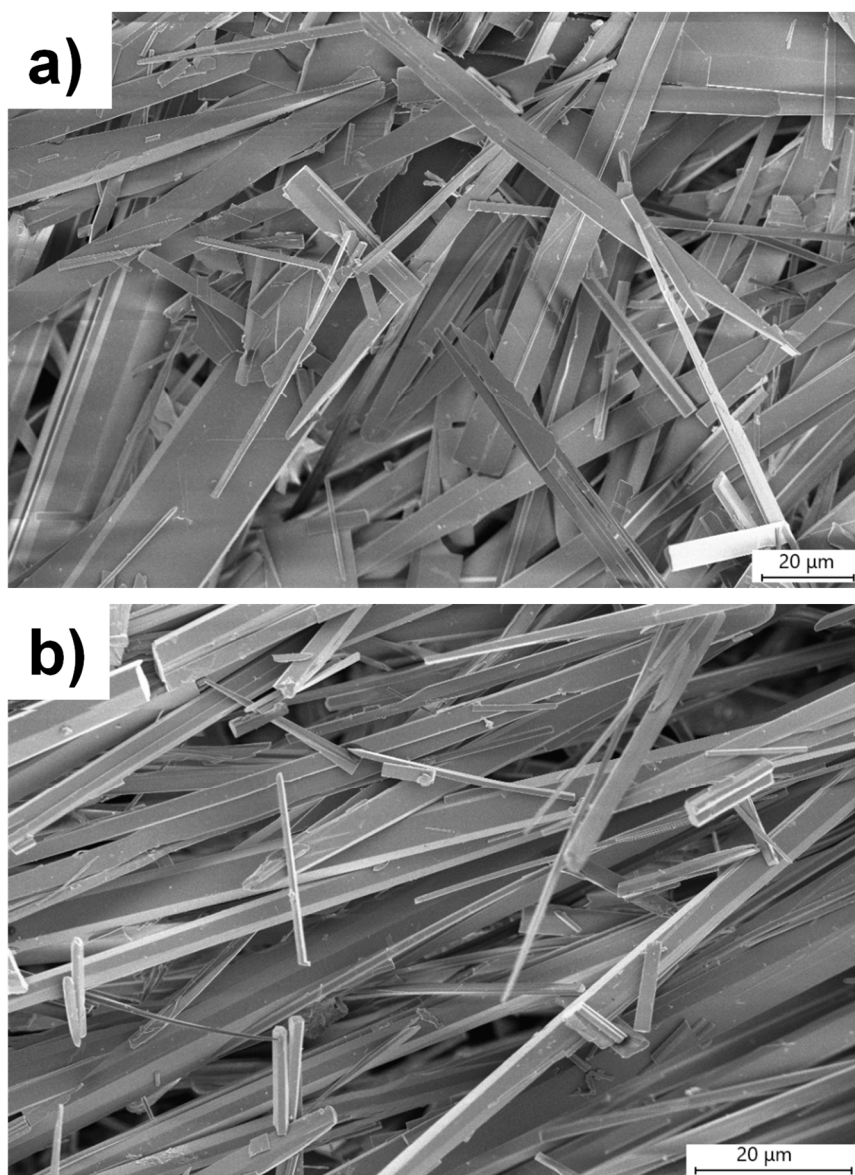

**Figure S6.** SEM images of  $L_3$  xerogels from (a) DMSO/water (1:1, v/v), and (b) methanol/water (1:1, v/v) at 2.0 wt/v%.

#### 4. X-ray crystallography

**Table S1:** Crystal data

| Crystal data                                                   | $L_3 \bullet H_2O$                | $L_3 \bullet 2H_2O$               |
|----------------------------------------------------------------|-----------------------------------|-----------------------------------|
| Empirical formula                                              | $C_{11}H_{11}N_3O_4$              | $C_{11}H_{11}N_3O_4$              |
| Color                                                          | Colorless                         | Colorless                         |
| Formula weight                                                 | 249.23                            | 249.23                            |
| Crystal size (mm)                                              | 0.19 x 0.05 x 0.03                | 0.22 x 0.16 x 0.10                |
| Crystal system                                                 | Monoclinic                        | Monoclinic                        |
| Space group                                                    | $P2_1/c$                          | $P2/c$                            |
| a (Å)                                                          | 3.73500(10)                       | 8.1758(8)                         |
| b (Å)                                                          | 12.7975(4)                        | 5.6771(5)                         |
| c (Å)                                                          | 22.9071(8)                        | 23.529(2)                         |
| $\alpha$ (°)                                                   | 90                                | 90                                |
| $\beta$ (°)                                                    | 90.0100(14)                       | 97.127(2)                         |
| $\gamma$ (°)                                                   | 90                                | 90                                |
| Volume (Å <sup>3</sup> )                                       | 1094.93(6)                        | 1083.66(18)                       |
| Z                                                              | 4                                 | 4                                 |
| $D_{calc.}$ (g/cm <sup>3</sup> )                               | 1.512                             | 1.528                             |
| F(000)                                                         | 520                               | 520                               |
| $\mu$ (mm <sup>-1</sup> )                                      | 0.998 (CuK $\alpha$ )             | 0.119 (MoK $\alpha$ )             |
| Temperature (K)                                                | 302(2)                            | 296(2)                            |
| Reflections collected/<br>unique/observed [ $I > 2\sigma(I)$ ] | 15306/ 1730/<br>1369              | 17613/ 2500/<br>2071              |
| Data/restraints/parameters                                     | 1730/0/171                        | 2500/0/172                        |
| Goodness of fit on $F^2$                                       | 1.045                             | 1.062                             |
| Final R indices [ $I > 2\sigma(I)$ ]                           | $R_1 = 0.0457$<br>$wR_2 = 0.1126$ | $R_1 = 0.0409$<br>$wR_2 = 0.1062$ |
| R indices (all data)                                           | $R_1 = 0.0624$<br>$wR_2 = 0.1227$ | $R_1 = 0.0524$<br>$wR_2 = 0.1144$ |

**Table S2:** Hydrogen bonding parameters

| <b>Compound L<sub>3</sub>•H<sub>2</sub>O</b>  |                     |         |          |            |             |                    |
|-----------------------------------------------|---------------------|---------|----------|------------|-------------|--------------------|
| No.                                           | Donor—H...Acceptor  | D—H(Å)  | H...A(Å) | D...A(Å)   | ∠D—H...A(°) | Symmetry operation |
| 1                                             | O(18)—H(1)···O(15)  | 1.00(3) | 1.79(3)  | 2.782(3)   | 170(3)      | 1+x,y,z            |
| 2                                             | O(18)—H(2)···O(15)  | 0.97(5) | 1.85(5)  | 2.796(3)   | 165(4)      | x,y,z              |
| 3                                             | O(18)—H(2)···N(14)  | 0.97(5) | 2.48(4)  | 3.318(3)   | 145(4)'     | x,y,z              |
| 4                                             | N(10)—H(10)···O(1)  | 0.86    | 2.01     | 2.852(2)   | 166         | 1-x,2-y,-z         |
| 5                                             | C(4)—H(4)···O(15)   | 0.93    | 2.58     | 3.266(3)   | 131         | 1+x,3/2-y,-1/2+z   |
| 6                                             | C(7)—H(7)···O(1)    | 0.93    | 2.47     | 3.354(3)   | 158         | -x,2-y,-z          |
| 7                                             | C(13)—H(13)···O(9)  | 0.93    | 2.52     | 3.166(3)   | 127         | -x,1-y,-z          |
| 8                                             | C(16)—H(16)···O(18) | 0.93    | 2.55     | 3.235(3)   | 131         | 1-x,1/2+y,1/2-z    |
| <b>Compound L<sub>3</sub>•2H<sub>2</sub>O</b> |                     |         |          |            |             |                    |
| No.                                           | Donor—H...Acceptor  | D—H(Å)  | H...A(Å) | D...A(Å)   | ∠D—H...A(°) | Symmetry operation |
| 1                                             | N(10)—H(10)···O(1)  | 0.86    | 2.07     | 2.8956(16) | 161         | 1-x,-y,1-z         |
| 2                                             | O(18)—H(18)···O(17) | 0.87(2) | 1.88(2)  | 2.7447(18) | 175(2)      | 1-x,2-y,1-z        |
| 3                                             | O(19)—H(19)···O(17) | 0.91(2) | 1.91(2)  | 2.8185(19) | 173(2)      | x,2-y,-1/2+z       |
| 4                                             | C(7)—H(7)···O(1)    | 0.93    | 2.35     | 3.2486(18) | 163         | 1-x,-y,1-z         |
| 5                                             | C(13)—H(13)···O(9)  | 0.93    | 2.37     | 3.1134(17) | 137         | -x,2-y,1-z         |
| 6                                             | C(15)—H(15)···O(18) | 0.93    | 2.39     | 3.129(2)   | 136         | 1-x,1-y,1-z        |
| 7                                             | C(16)—H(16)···O(1)  | 0.93    | 2.39     | 3.155(2)   | 139         | 1-x,-y,1-z         |

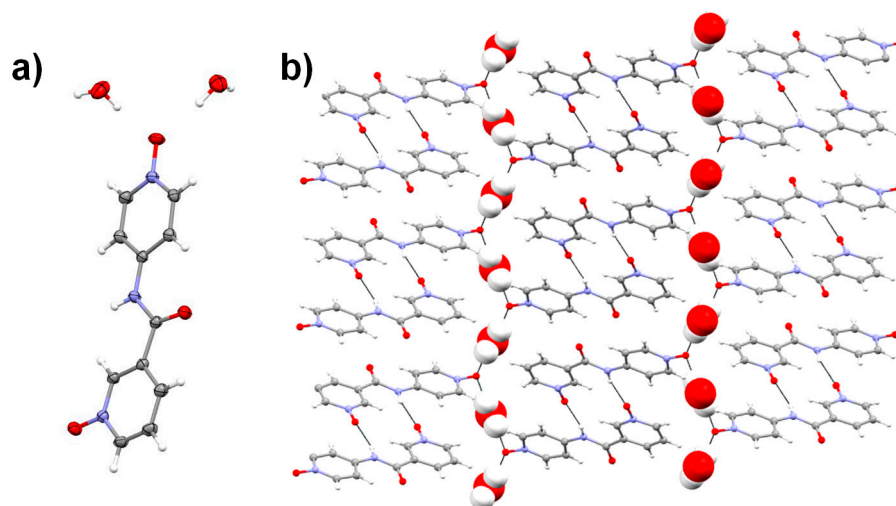

**Figure S7.** (a) Molecular structure of  $L_3 \cdot 2H_2O$  and (b) two-dimensional hydrogen-bonded network with water molecules (space fill model) located in the cavity.

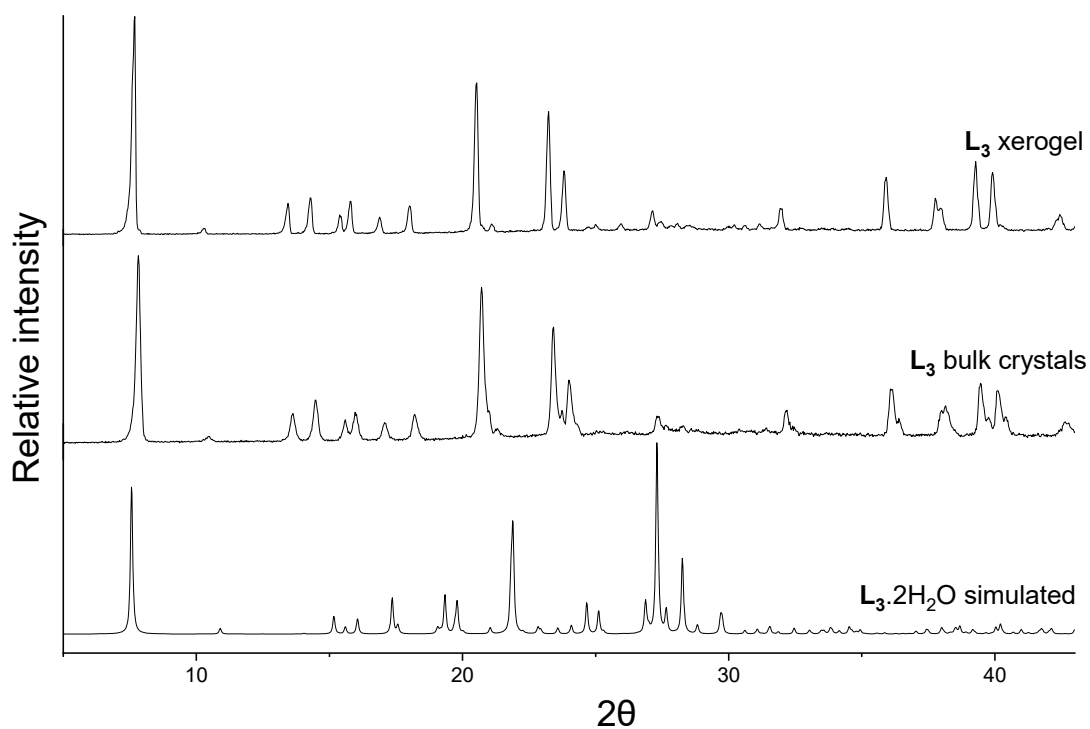

**Figure S8.** Comparison of the simulated pattern of the single-crystal X-ray structure of  $L_3 \cdot 2H_2O$  with the PXRD pattern of the bulk crystals obtained from water, and xerogel from water at 2.0 wt%.

## 5. Physical properties of the gels in the presence of salts

**Table S3:** Stimuli-responsive properties of the gelators **L<sub>1</sub>** and **L<sub>3</sub>**: Anion sensing in water at 1.5 wt%

| Salts (1.0 equiv.)                           | <b>L<sub>1</sub></b> | <b>L<sub>3</sub></b> |
|----------------------------------------------|----------------------|----------------------|
| NaF                                          | G                    | G                    |
| NaCl                                         | G                    | G                    |
| NaBr                                         | G                    | G                    |
| NaI                                          | Ppt                  | PG                   |
| KF                                           | G                    | G                    |
| KCl                                          | G                    | G                    |
| KBr                                          | G                    | G                    |
| KI                                           | G                    | G                    |
| NaNO <sub>3</sub>                            | C                    | G                    |
| NaSO <sub>4</sub>                            | C                    | Ppt                  |
| NaN <sub>3</sub>                             | C                    | G                    |
| KCN                                          | C                    | S                    |
| KClO <sub>4</sub>                            | Ppt                  | PG                   |
| KPF <sub>6</sub>                             | C                    | G                    |
| KBF <sub>4</sub>                             | C                    | G                    |
| KSCN                                         | C                    | PG                   |
| K <sub>2</sub> C <sub>2</sub> O <sub>4</sub> | C                    | G                    |
| KNO <sub>3</sub>                             | C                    | G                    |

C-colloid, G-gel, PG-partial gel, Ppt-Precipitate

**Table S4:** Increase in *G'* values of the gelators at 1.5 wt% in the presence of various sodium and potassium salts in comparison with the hydrogels (1.8 wt%)

| Salt added                                   | Equivalence (equiv.) | <b>L<sub>1</sub></b><br>1.5% | <b>L<sub>3</sub></b><br>1.5% |
|----------------------------------------------|----------------------|------------------------------|------------------------------|
| NaF                                          | 1.0                  | 2.0-fold                     | 2.8-fold                     |
| KF                                           | 1.0                  | 2.6-fold                     | 3.0-fold                     |
| NaCl                                         | 1.0                  | 1.8-fold                     | 4.3-fold                     |
| KCl                                          | 1.0                  | 3.0-fold                     | 5.7-fold                     |
| NaBr                                         | 1.0                  | 1.5-fold                     | 3.0-fold                     |
| KBr                                          | 1.0                  | 3.0-fold                     | 2.3-fold                     |
| KI                                           | 1.0                  | ---                          | 1.7-fold                     |
| KNO <sub>3</sub>                             | 1.0                  | ---                          | 1.9-fold                     |
| KBF <sub>4</sub>                             | 1.0                  | ---                          | 4.8-fold                     |
| KPF <sub>6</sub>                             | 1.0                  | ---                          | 5.0-fold                     |
| K <sub>2</sub> C <sub>2</sub> O <sub>4</sub> | 1.0                  | ---                          | 1.8-fold                     |

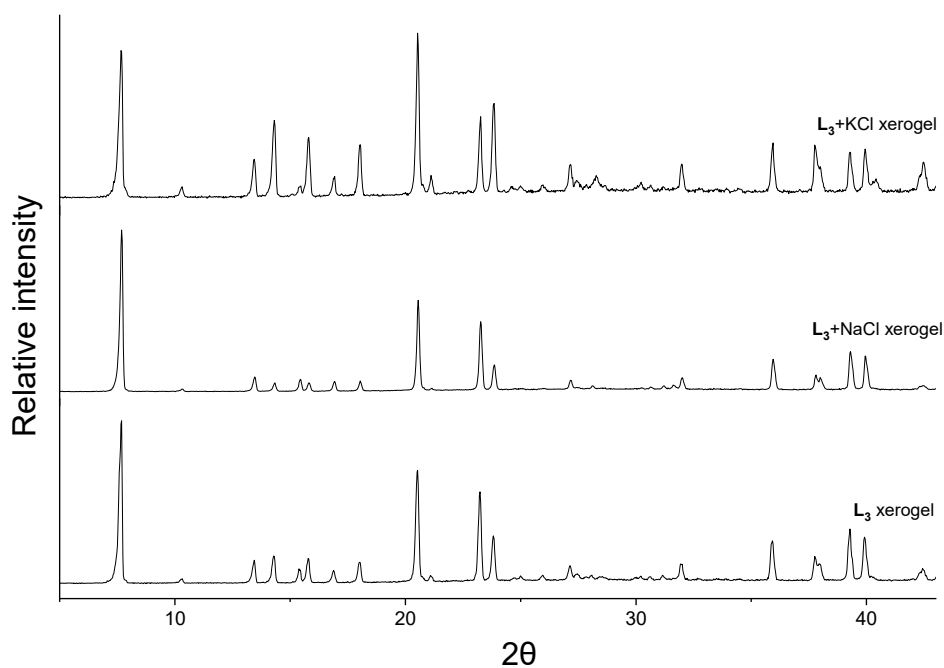

**Figure S9.** PXRD pattern of xerogels obtained from the hydrogel of **L<sub>3</sub>** at 2.0 wt% and in the presence of 1.0 equivalence of NaCl and KCl.

**Table S5:** Stimuli-responsive properties of the gelators **L<sub>1</sub>** and **L<sub>3</sub>**: Cation sensing in water at 1.5 wt%

| Salts (1.0 equiv.) | <b>L<sub>1</sub></b> | <b>L<sub>3</sub></b> |
|--------------------|----------------------|----------------------|
| CsCl               | G                    | G                    |
| MgCl <sub>2</sub>  | G                    | G                    |
| CaCl <sub>2</sub>  | G                    | G                    |
| SrCl <sub>2</sub>  | G                    | G                    |
| BaCl <sub>2</sub>  | G                    | G                    |
| AlCl <sub>3</sub>  | S                    | PG                   |
| NH <sub>4</sub> Cl | PG                   | G                    |
| CuCl <sub>2</sub>  | Ppt                  | PG                   |
| ZnCl <sub>2</sub>  | Ppt                  | G                    |
| CdCl <sub>2</sub>  | Ppt                  | G                    |

**Table S6:** Increase in *G'* values of the gelators at 1.5 wt% in the presence of chloride salts of various cations in comparison with the hydrogels (1.8 wt%)

| Salt added         | Equivalence | <b>L<sub>1</sub></b> | <b>L<sub>3</sub></b> |
|--------------------|-------------|----------------------|----------------------|
| CsCl               | 1.0         | 1.1-fold             | 3.8-fold             |
| MgCl <sub>2</sub>  | 1.0         | 1.9-fold             | 4.8-fold             |
| CaCl <sub>2</sub>  | 1.0         | 1.7-fold             | 5.0-fold             |
| SrCl <sub>2</sub>  | 1.0         | 1.8-fold             | 2.3-fold             |
| BaCl <sub>2</sub>  | 1.0         | 1.5-fold             | 1.8-fold             |
| NH <sub>4</sub> Cl | 1.0         | ---                  | 1.6-fold             |
| CuCl <sub>2</sub>  | 1.0         | ---                  | -----                |
| ZnCl <sub>2</sub>  | 1.0         | ---                  | 2.8-fold             |
| CdCl <sub>2</sub>  | 1.0         | ---                  | 24.7-fold            |

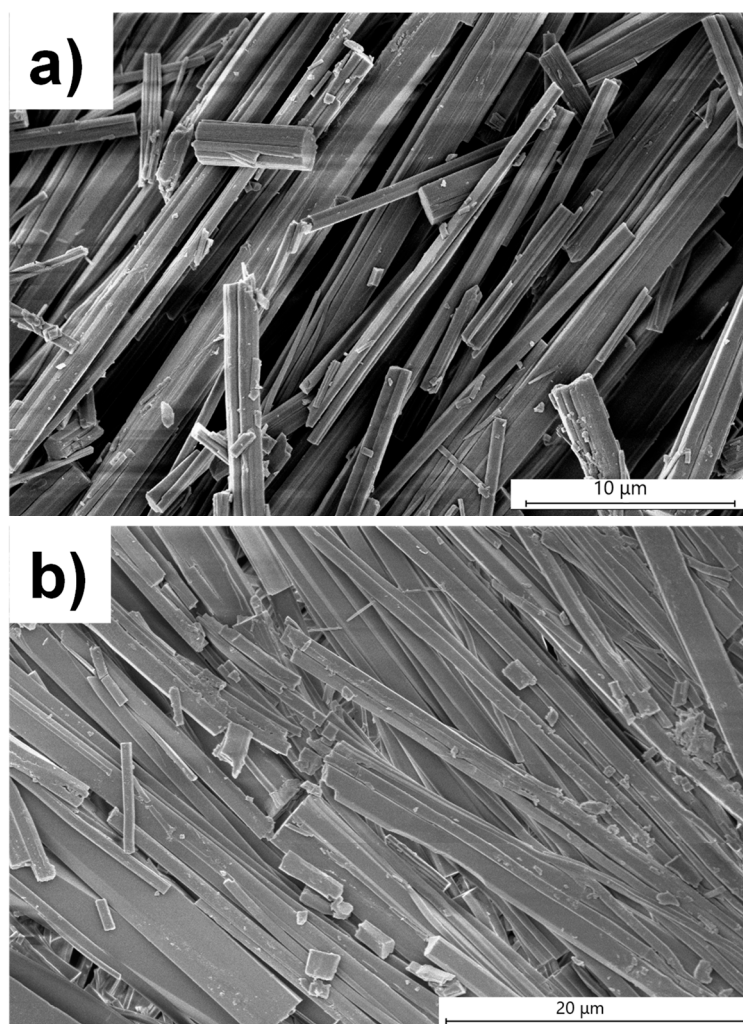

**Figure S10.** SEM images of xerogels of (a)  $L_1$  and (b)  $L_3$  at 2.0 wt% obtained from water in the presence of 1.0 equivalence of  $MgCl_2$ .

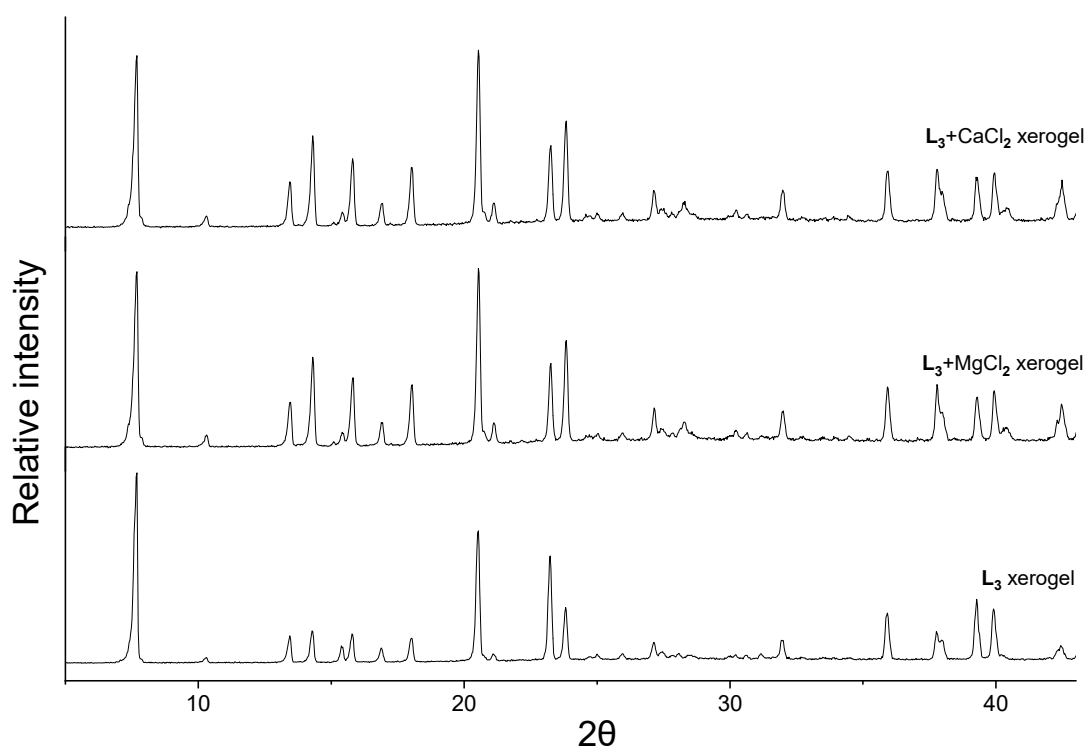

**Figure S11.** Comparison of the PXR D pattern of xerogels (2.0 wt%) of L<sub>3</sub> hydrogels, and the gels in the presence of 1.0 equivalence of MgCl<sub>2</sub> and CaCl<sub>2</sub>.

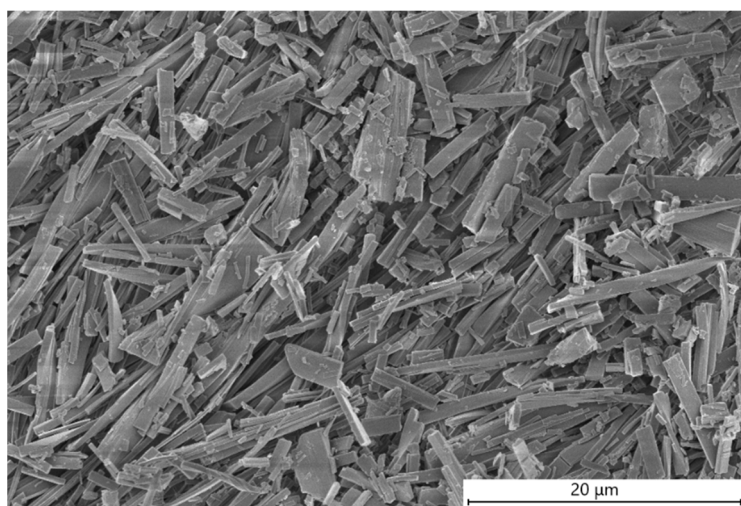

**Figure S12.** SEM images of the xerogels of L<sub>3</sub> in the presence of 1.0 equivalence of CdCl<sub>2</sub> in water at 2.0 wt%.

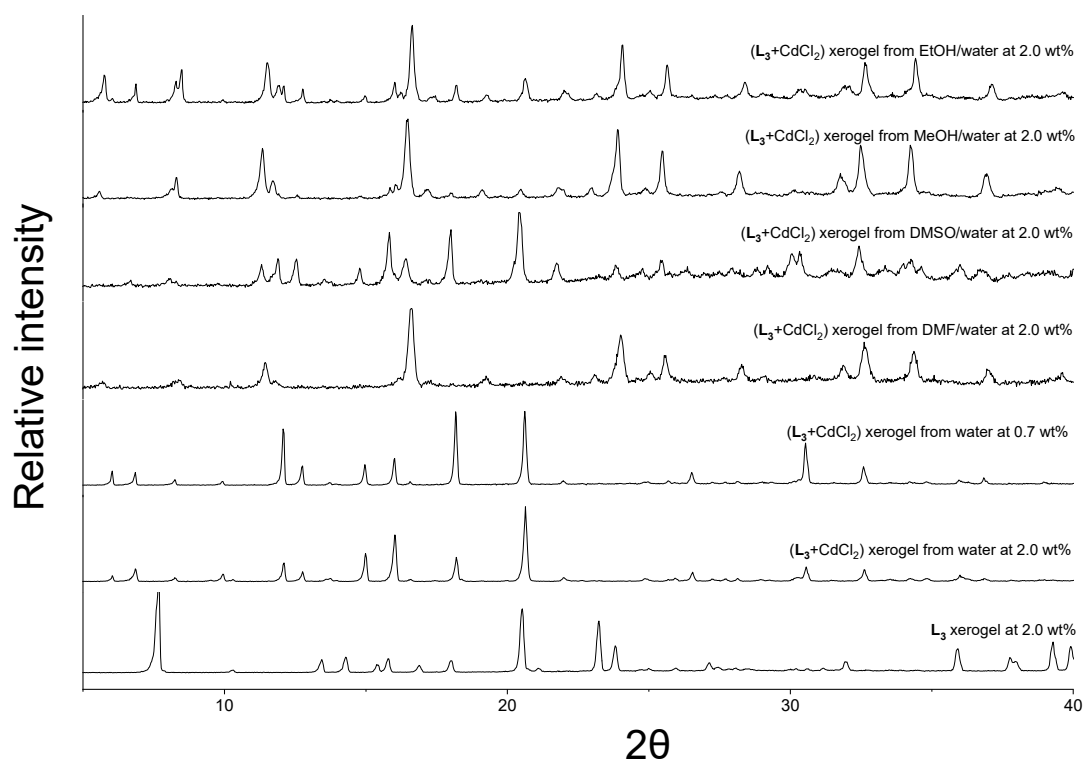

**Figure S13.** Comparison of the PXRD pattern of  $L_3$  xerogel with the PXRD pattern of the xerogels of  $L_3$ - $CdCl_2$  mixture in various solvents.

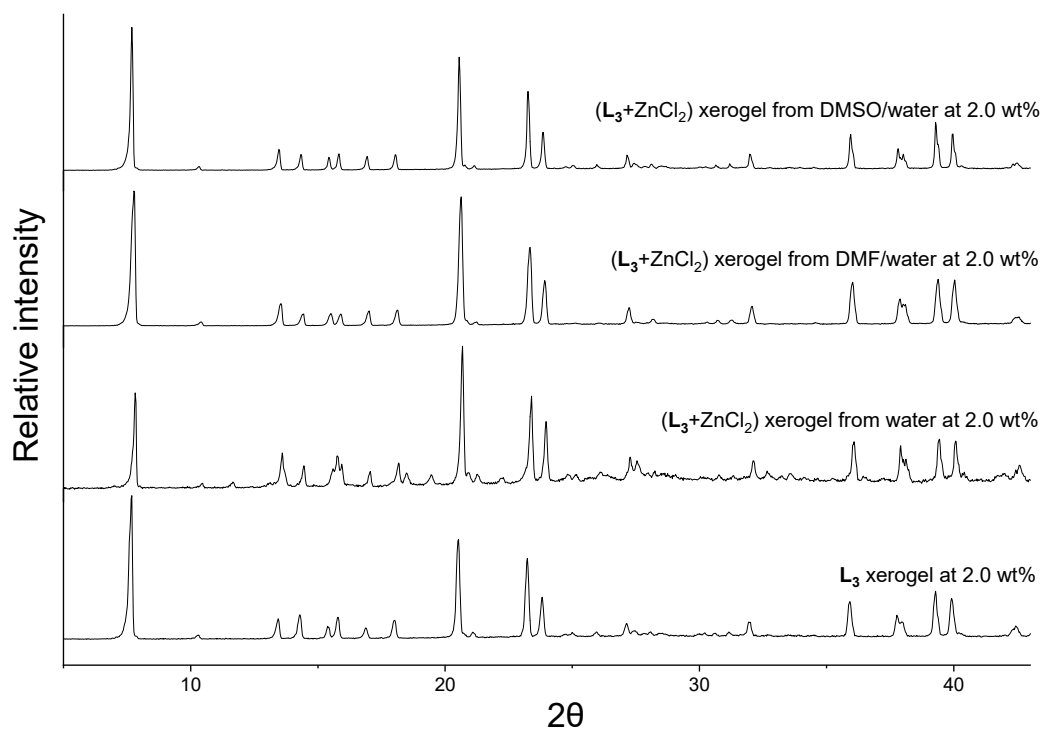

**Figure S14.** Comparison of the PXRD pattern of  $L_3$  xerogel from water with the PXRD pattern of the xerogels of the mixture ( $L_3 + ZnCl_2$ ) in various solvents.

## 6. NMR spectra

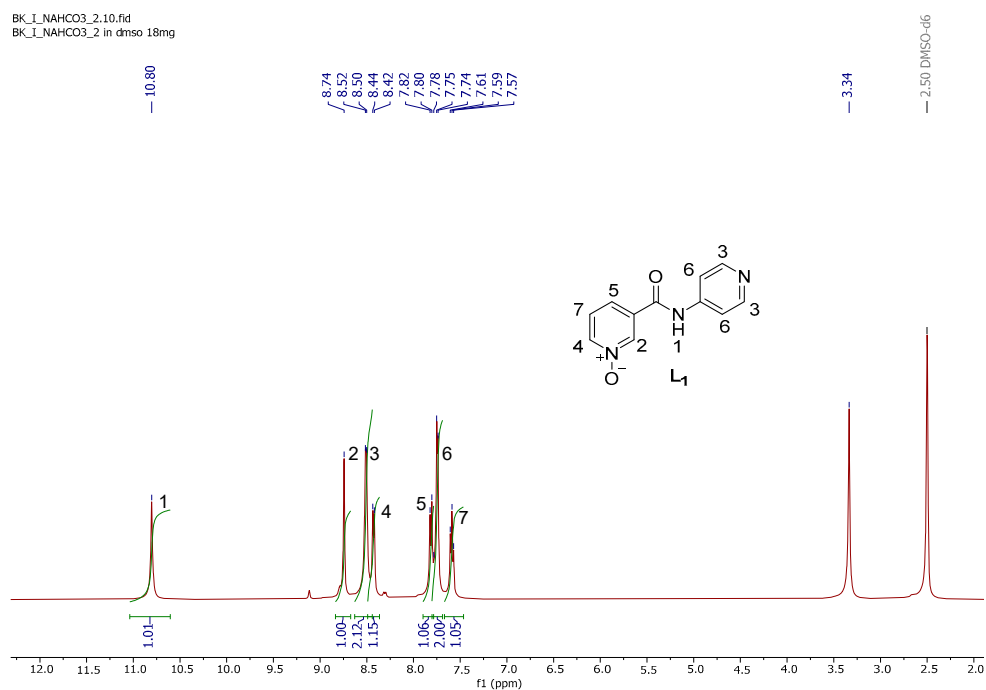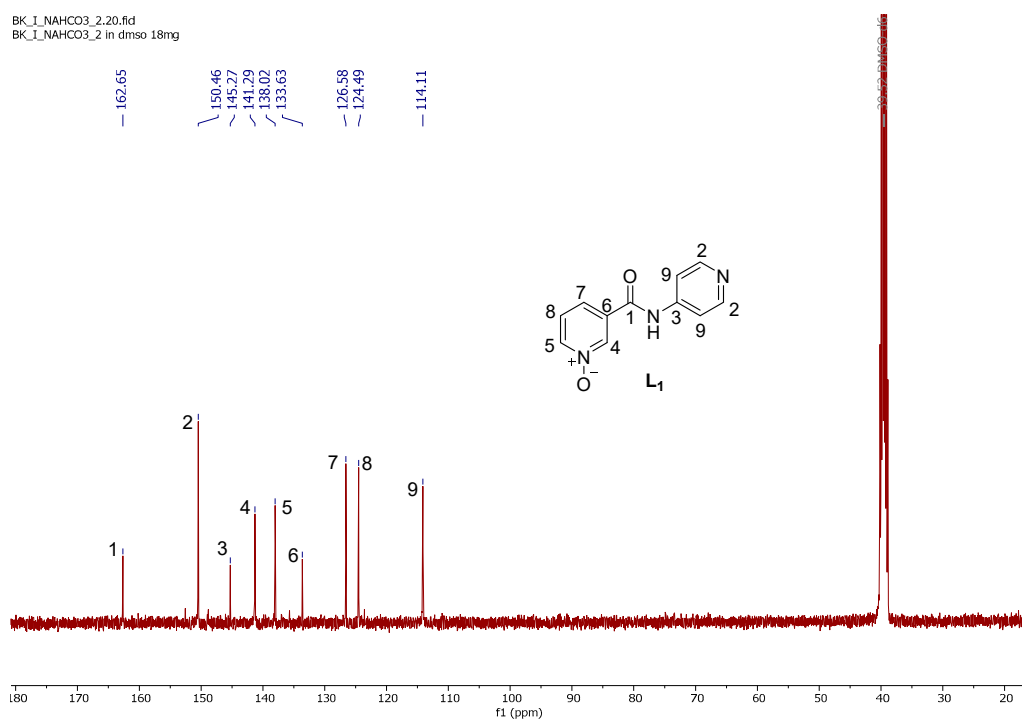

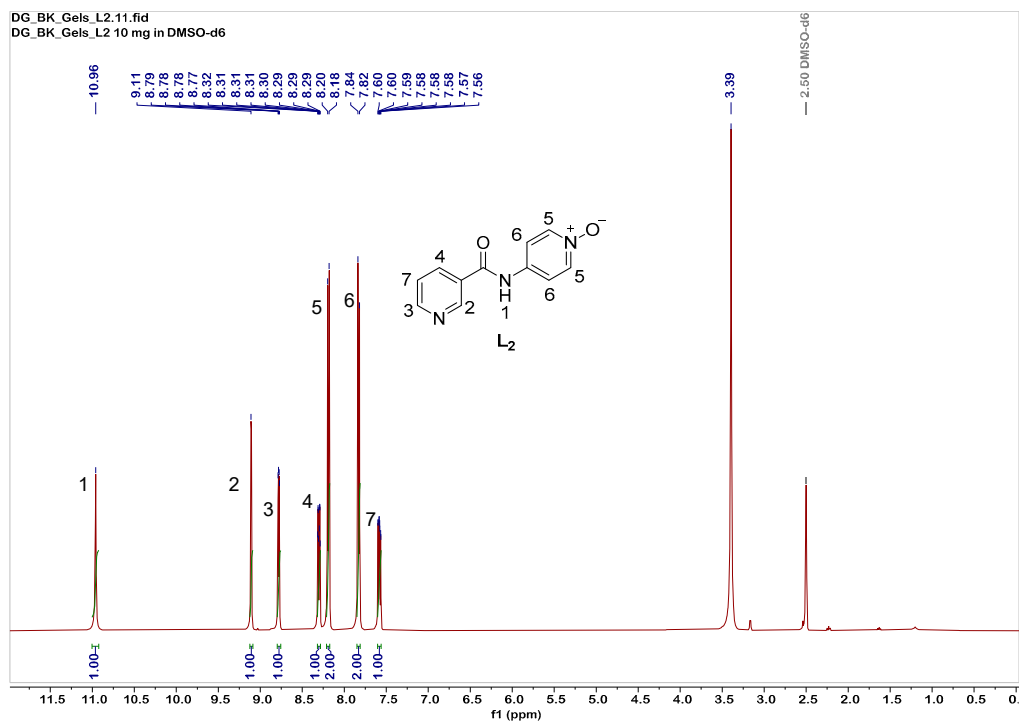

**Figure S17.** <sup>1</sup>H NMR spectrum of compound **L<sub>2</sub>**.

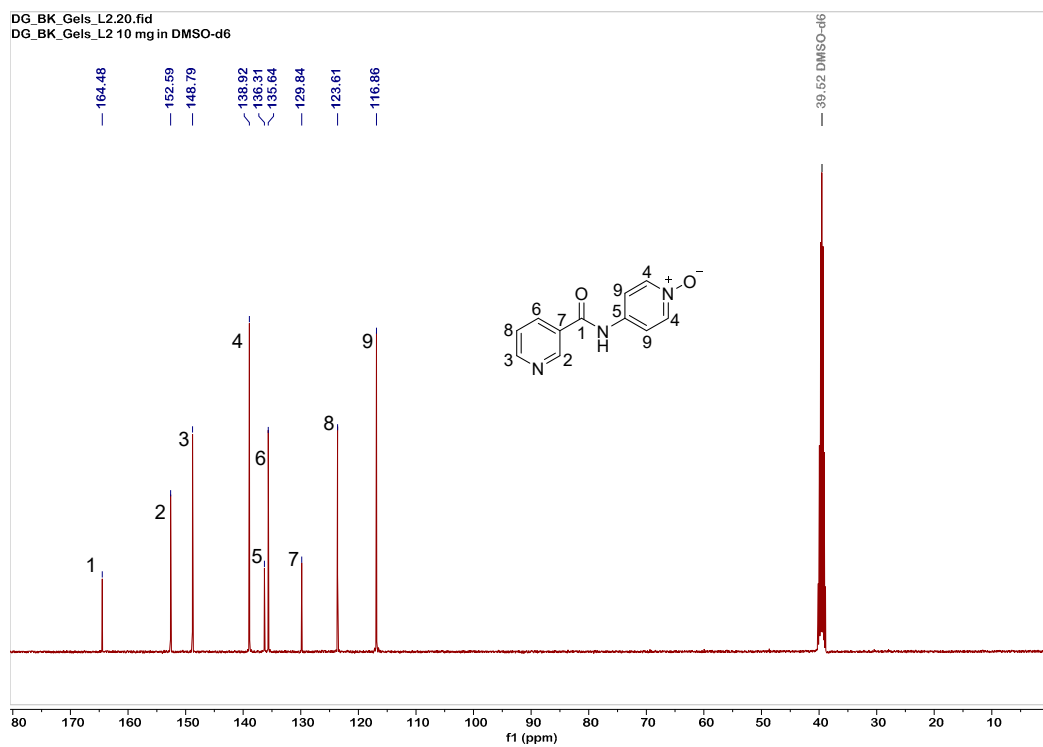

**Figure S18.** <sup>13</sup>C NMR spectrum of compound **L<sub>2</sub>**.

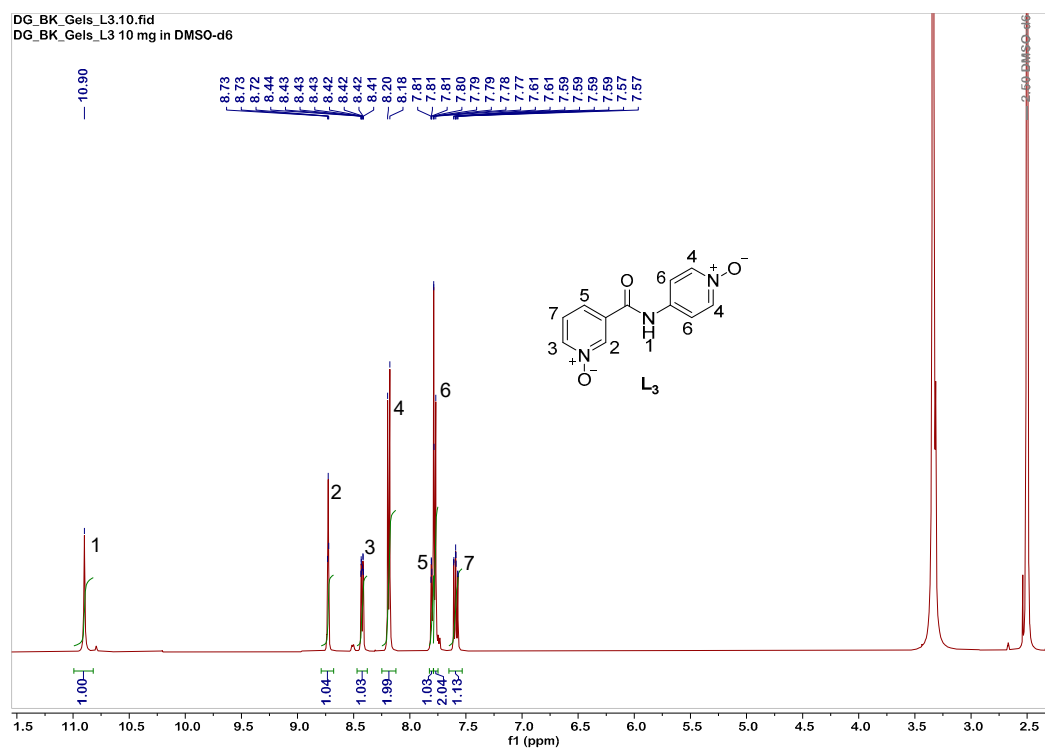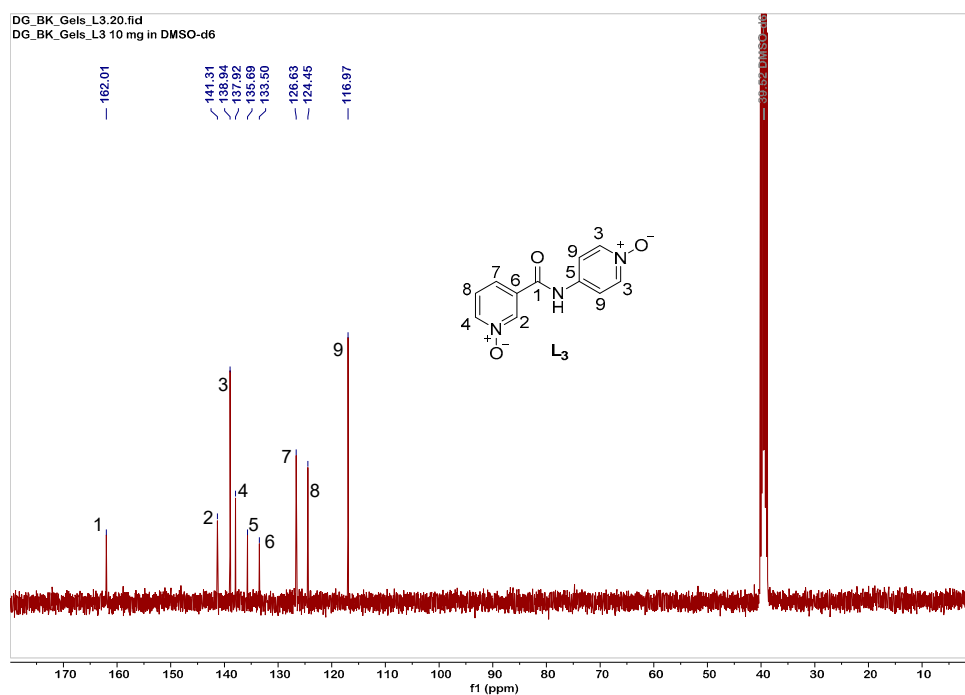

Supplement: s1 [file s1]
